# Supplementary material for: Mutations in an Innate Immunity Pathway Are Associated with Poor Overall Survival Outcomes and Hypoxic Signaling in Cancer
Source: PubMed Central journal article supplement — Cell Rep. Author manuscript; Available in PMC 2019 Mar 7. (PMC6405289; doi:10.1016/j.celrep.2018.11.093), 2018-12-26
Supplement: NIHMS1517594-supplement-1.pdf [file NIHMS1517594-supplement-1.pdf]

**Cell Reports, Volume 25**

**Supplemental Information**

**Mutations in an Innate Immunity Pathway  
Are Associated with Poor Overall Survival Outcomes  
and Hypoxic Signaling in Cancer**

**Monica M. Olcina, Nikolas G. Balanis, Ryan K. Kim, B. Arman Aksoy, Julia Kodysh, Michael J. Thompson, Jeff Hammerbacher, Thomas G. Graeber, and Amato J. Giaccia**

## **Inventory of Supplemental Information**

### **Supplemental Figures and legends**

Figures S1A-I. Relating to Figure 1

Figures S2A-J. Relating to Figure 3

Figures S3A-I. Relating to Figure 4

### **Supplemental Tables:**

Tables S1A-I. Relating to Figure 1

Tables S2A-W. Relating to Figure 2

Tables S3A-K. Relating to Figure 3

**A**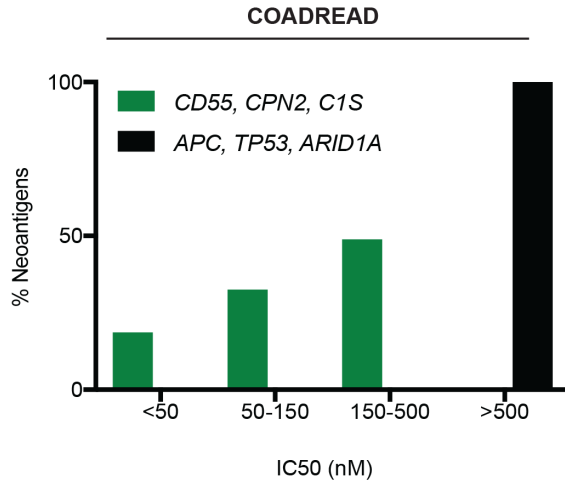**B**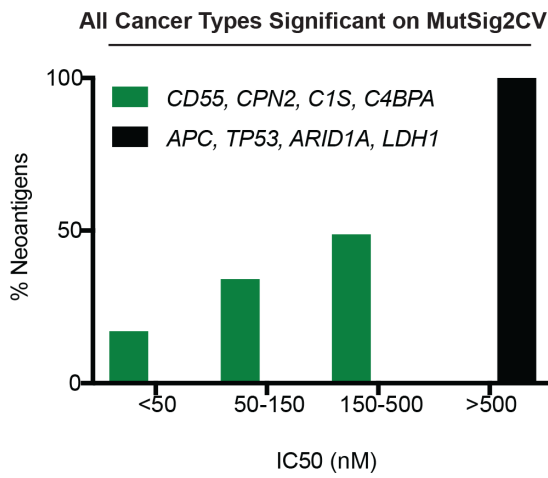**COADREAD**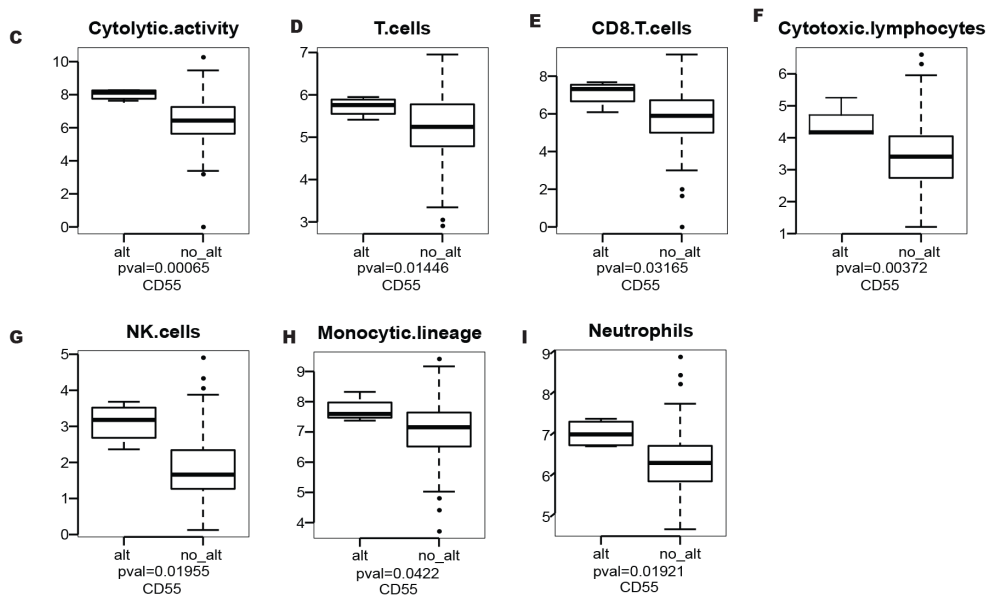

**Figure S1: Complement mutations predicted to be “drivers” can give rise to predicted neoantigens.**

**Related to Figure 1.**

- (A) Graph shows the % neoantigens binding with either strong (<50 nM), moderate (50-150 nM), weak (150-500 nM) and very weak (>500 nM) affinity for predicted neoantigens derived from three complement mutations (*CD55*, *CPN2* and *CIS*) and neoantigens derived from *APC*, *TP53* and *ARID1A* mutations in COADREAD. 41 predicted true complement mutation-derived neoantigens were compared to 41 predicted true neoantigens derived from *APC*, *TP53* and *ARID1A* mutations in COADREAD.
- (B) Graph shows the % neoantigens binding with either strong (<50 nM), moderate (50-150 nM), weak (150-500 nM) and very weak (>500 nM) affinity for predicted neoantigens derived from complement mutations (*CD55*, *CPN2*, *CIS* and *C4BPA*), and neoantigens derived from *APC*, *TP53*, *ARID1A* and *LDHI* mutations. 43 predicted true complement mutation-derived neoantigens (from *CD55*, *CPN2*, *CIS* mutations from COADREAD and *C4BPA* from LGG) were compared to 43 predicted true neoantigens derived from *APC*, *TP53* and *ARID1A* mutations in COADREAD and *LDHI* in LGG.
- (C) **(I)** Differential predicted immune infiltration profiles for patients with or without *CD55* mutations in COADREAD are shown.

All Complement genes

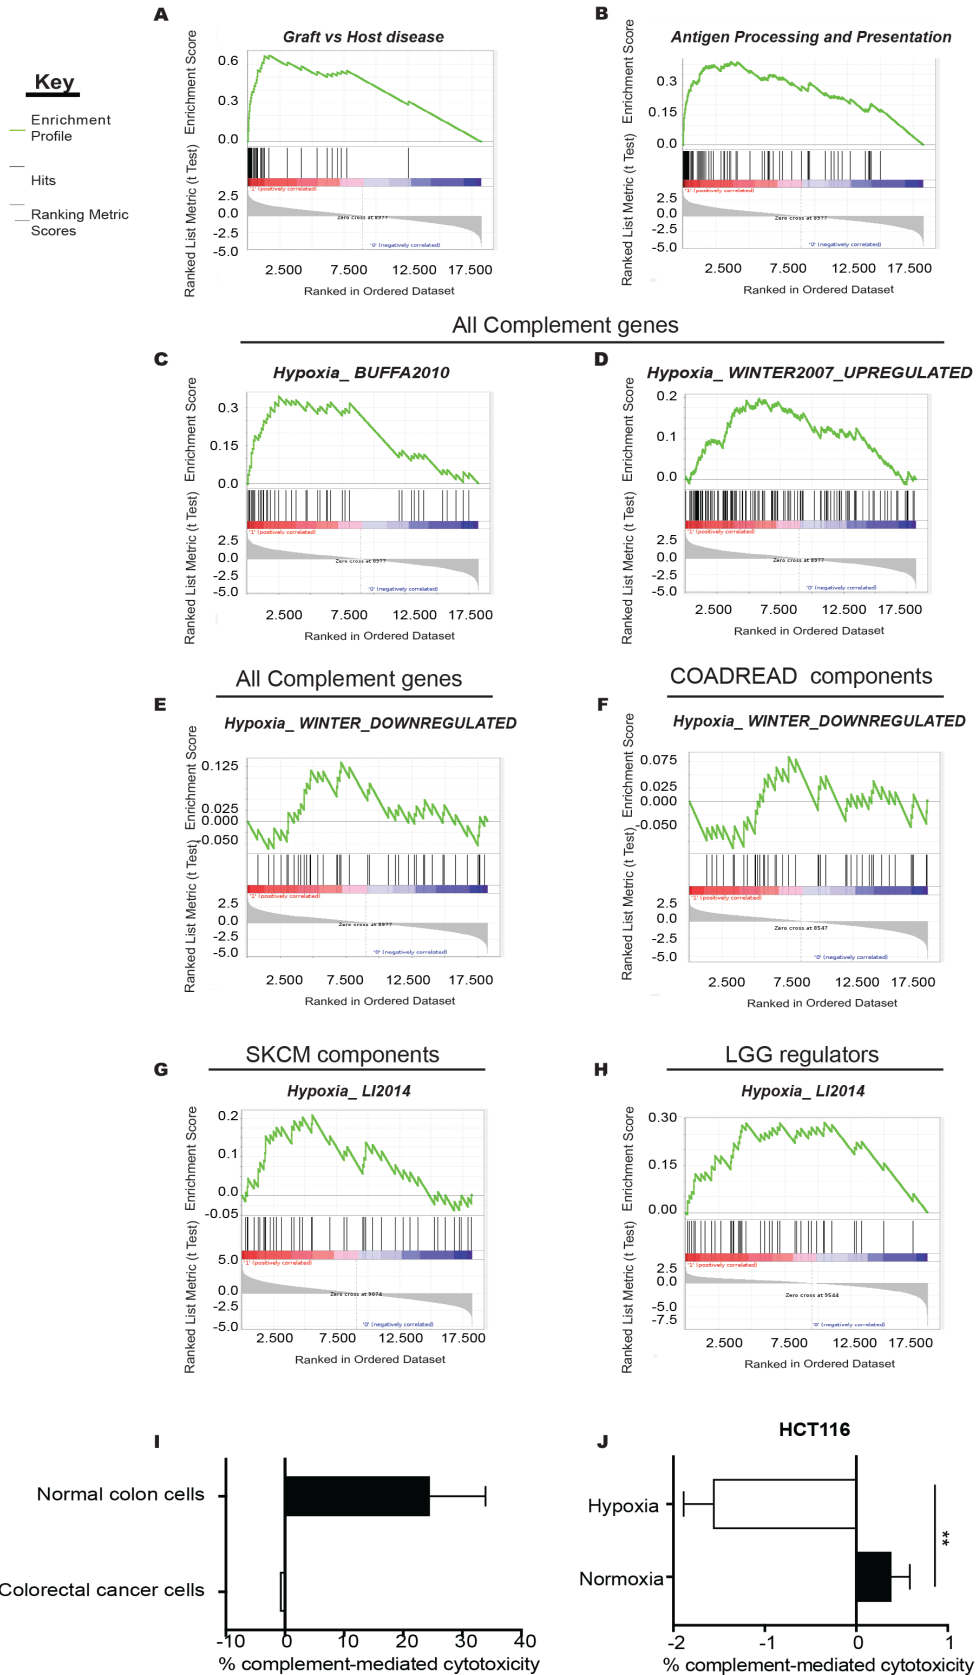

**Figure S2: Hypoxia inhibits complement-mediated cytotoxicity (CMC) in colorectal cancer.**

**Related to Figure 3.**

- (A) GSEA plot for “Graft vs host disease” in COADREAD patients with any complement mutation.
- (B) GSEA plot for “Antigen processing and presentation” in COADREAD patients with any complement mutation.
- (C) GSEA plot for “Hypoxia\_Buffa2010” in COADREAD patients with any complement mutation.
- (D) GSEA plot for “Hypoxia\_Winter2007 upregulated” in COADREAD patients with any complement mutation.
- (E) GSEA plot for “Hypoxia\_Winter downregulated” in COADREAD patients with any complement mutation.
- (F) GSEA plot for “Hypoxia\_Winter downregulated” in COADREAD patients with *component* mutations.
- (G) GSEA plot for “Hypoxia\_Li2014” in SKCM patients with *component* mutations.
- (H) GSEA plot for “Hypoxia\_Li2014” in LGG patients with *regulator* mutations.
- (I) Graph represents the % CMC/total lysis in fetal human normal colon (FHC) cells and HCT116 colorectal cancer cells. CMC/total lysis was assessed by calcein release/total lysis following treatment with either normal human serum or heat inactivated normal human serum. Error bars represent the SEM for a representative experiment. n=2
- (J) Graph represents the % CMC/total lysis in HCT116 colorectal cancer cells exposed to normoxia (21% O<sub>2</sub>) or hypoxia (1% O<sub>2</sub>) for 24 hr. CMC/total lysis was assessed by calcein release/total lysis following treatment with either normal human serum or heat inactivated normal human serum. \*\* = p-value <0.01, unpaired t-test, two-tailed. Error bars represent the SEM for a representative experiment. n=3

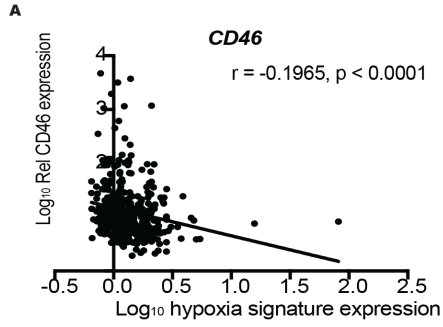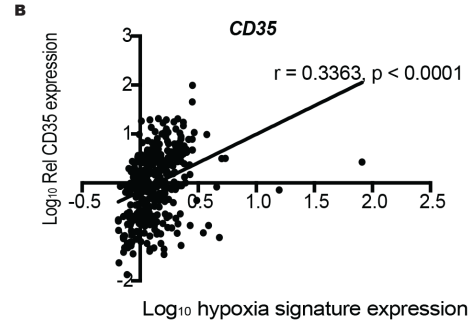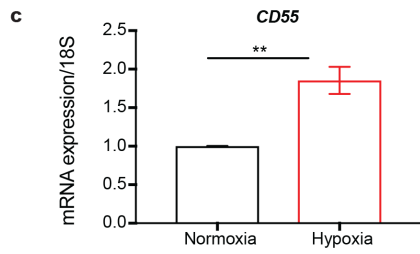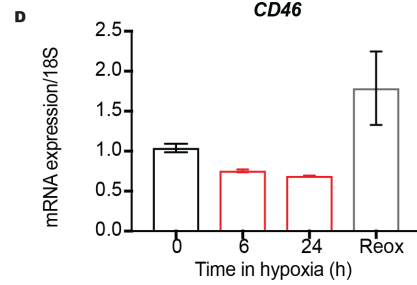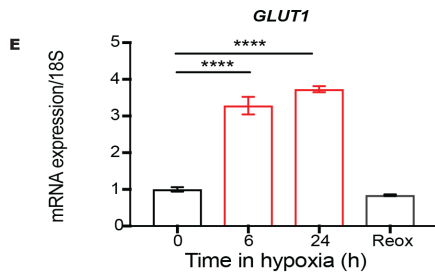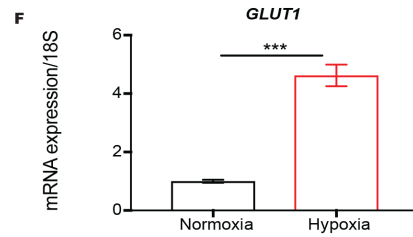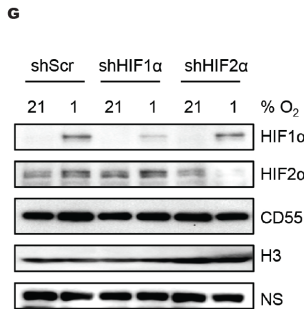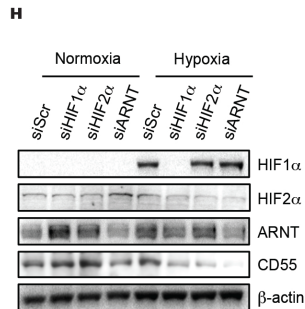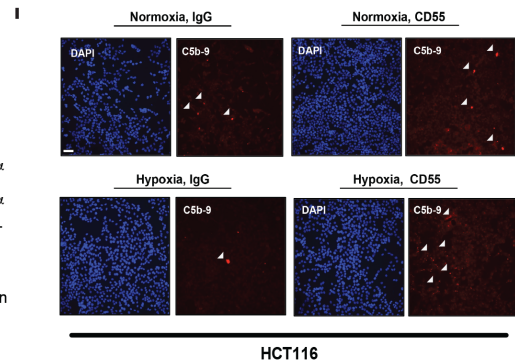

**Figure S3: Hypoxia-induced expression of complement regulator CD55 contributes to inhibition of CMC. Related to Figure 4.**

- (A) Relative expression of *CD46* (Log<sub>10</sub> conversion) in COADREAD patients is shown against hypoxia signature expression (Log<sub>10</sub> conversion)(Li et al., 2014). Two-tailed p-value is shown for the Pearson r (correlation coefficient).
- (B) Relative expression of *CD35* (Log<sub>10</sub> conversion) in COADREAD patients is shown against hypoxia signature expression (Log<sub>10</sub> conversion)(Li et al., 2014). Two-tailed p-value is shown for the Pearson r (correlation coefficient).
- (C) mRNA expression of *CD55/18S* is shown. qPCR was carried out following treatment of RKO colorectal cancer cells with 0 or 24 hr of hypoxia (1% O<sub>2</sub>). \*\* = p-value <0.01, unpaired t-test, two-tailed. Error bars represent the SEM for a representative experiment. n=3.
- (D) mRNA expression of *CD46/18S* is shown. qPCR was carried out following treatment of HCT116 cells with 0, 6 or 24 hr of hypoxia (1% O<sub>2</sub>) or 24 hr of hypoxia followed by 1 hr reoxygenation (21% O<sub>2</sub>). Error bars represent the SEM for a representative experiment. n=3.
- (E) mRNA expression of *GLUT1/18S* is shown. qPCR was carried out following treatment of HCT116 colorectal cancer cells with 0, 6 or 24 hr of hypoxia (1% O<sub>2</sub>) or 24 hr of hypoxia followed by 1 hr reoxygenation (21% O<sub>2</sub>). \*\*\*\* = p-value <0.0001, 1-way ANOVA with Tukey's multiple comparisons test. Error bars represent the SEM for a representative experiment. n=3.
- (F) mRNA expression of *GLUT1/18S* is shown. qPCR was carried out following treatment of RKO colorectal cancer cells with 0 or 24 hr of hypoxia (1% O<sub>2</sub>). \*\*\* = p-value <0.001, unpaired t-test, two-tailed. Error bars represent the SEM for a representative experiment. n=3.
- (G) HCT116 cells were transduced with either scramble (Scr), HIF1 $\alpha$  or HIF2 $\alpha$  shRNA and exposed to normoxia (21% O<sub>2</sub>) or hypoxia (1% O<sub>2</sub>) for 24 hr. WB was carried with the antibodies indicated. H3 = loading control. N.S = non-specific band that can indirectly provide an indication of loading. n=3.
- (H) HCT116 cells were transfected with either scramble (Scr), HIF1 $\alpha$ , HIF2 $\alpha$  or ARNT/HIF1 $\beta$  siRNA and exposed to normoxia (21% O<sub>2</sub>) or hypoxia (1% O<sub>2</sub>) for 24 hr. WB was carried with the antibodies indicated.  $\beta$ -actin = loading control. n=3.



**(I)** HCT116 cells were treated as in (Figure 4G/H). Immunofluorescence staining for membrane attack complex (C5b-9) was performed as a marker for CMC. C5b-9 = red, DAPI = blue. White arrows indicate areas of C5b-9 staining. Scale bar in white = 59.7  $\mu$ M.
